# Supplementary material for: Identification of quinazoline compounds as novel potent inhibitors of Wnt/β-catenin signaling in colorectal cancer cells
Source: PubMed Central journal article supplement (PMC4905471; doi:10.18632/oncotarget.7019), 2016-01-25
Supplement: oncotarget-07-11263-s001.pdf [file oncotarget-07-11263-s001.pdf]

## **SUPPLEMENTARY TABLE**

**Supplementary Table S1: Quinzaoline compounds evaluated in the Wnt signaling reporter assay**

See Supplementary File 1
